# Supplementary material
Source: PubMed Central journal article supplement (PMC8651551)
Supplement: mmc1.pdf [file mmc1.pdf]

## Supplemental information

### **SARS-CoV-2 ferritin nanoparticle vaccines elicit**

### **broad SARS coronavirus immunogenicity**

**M. Gordon Joyce, Wei-Hung Chen, Rajeshwer S. Sankhala, Agnes Hajduczki, Paul V. Thomas, Misook Choe, Elizabeth J. Martinez, William C. Chang, Caroline E. Peterson, Elaine B. Morrison, Clayton Smith, Rita E. Chen, Aslaa Ahmed, Lindsay Wiczorek, Alexander Anderson, James Brett Case, Yifan Li, Therese Oertel, Lorean Rosado, Akshaya Ganesh, Connor Whalen, Joshua M. Carmen, Letzibeth Mendez-Rivera, Christopher P. Karch, Neelakshi Gohain, Zuzana Villar, David McCurdy, Zoltan Beck, Jiae Kim, Shikha Shrivastava, Ousman Jobe, Vincent Dussupt, Sebastian Molnar, Ursula Tran, Chandrika B. Kannadka, Sandrine Soman, Caitlin Kuklis, Michelle Zemil, Htet Khanh, Weimin Wu, Matthew A. Cole, Debra K. Duso, Larry W. Kummer, Tricia J. Lang, Shania E. Muncil, Jeffrey R. Currier, Shelly J. Krebs, Victoria R. Polonis, Saravanan Rajan, Patrick M. McTamney, Mark T. Esser, William W. Reiley, Morgane Rolland, Natalia de Val, Michael S. Diamond, Gregory D. Gromowski, Gary R. Matyas, Mangala Rao, Nelson L. Michael, and Kayvon Modjarrad**

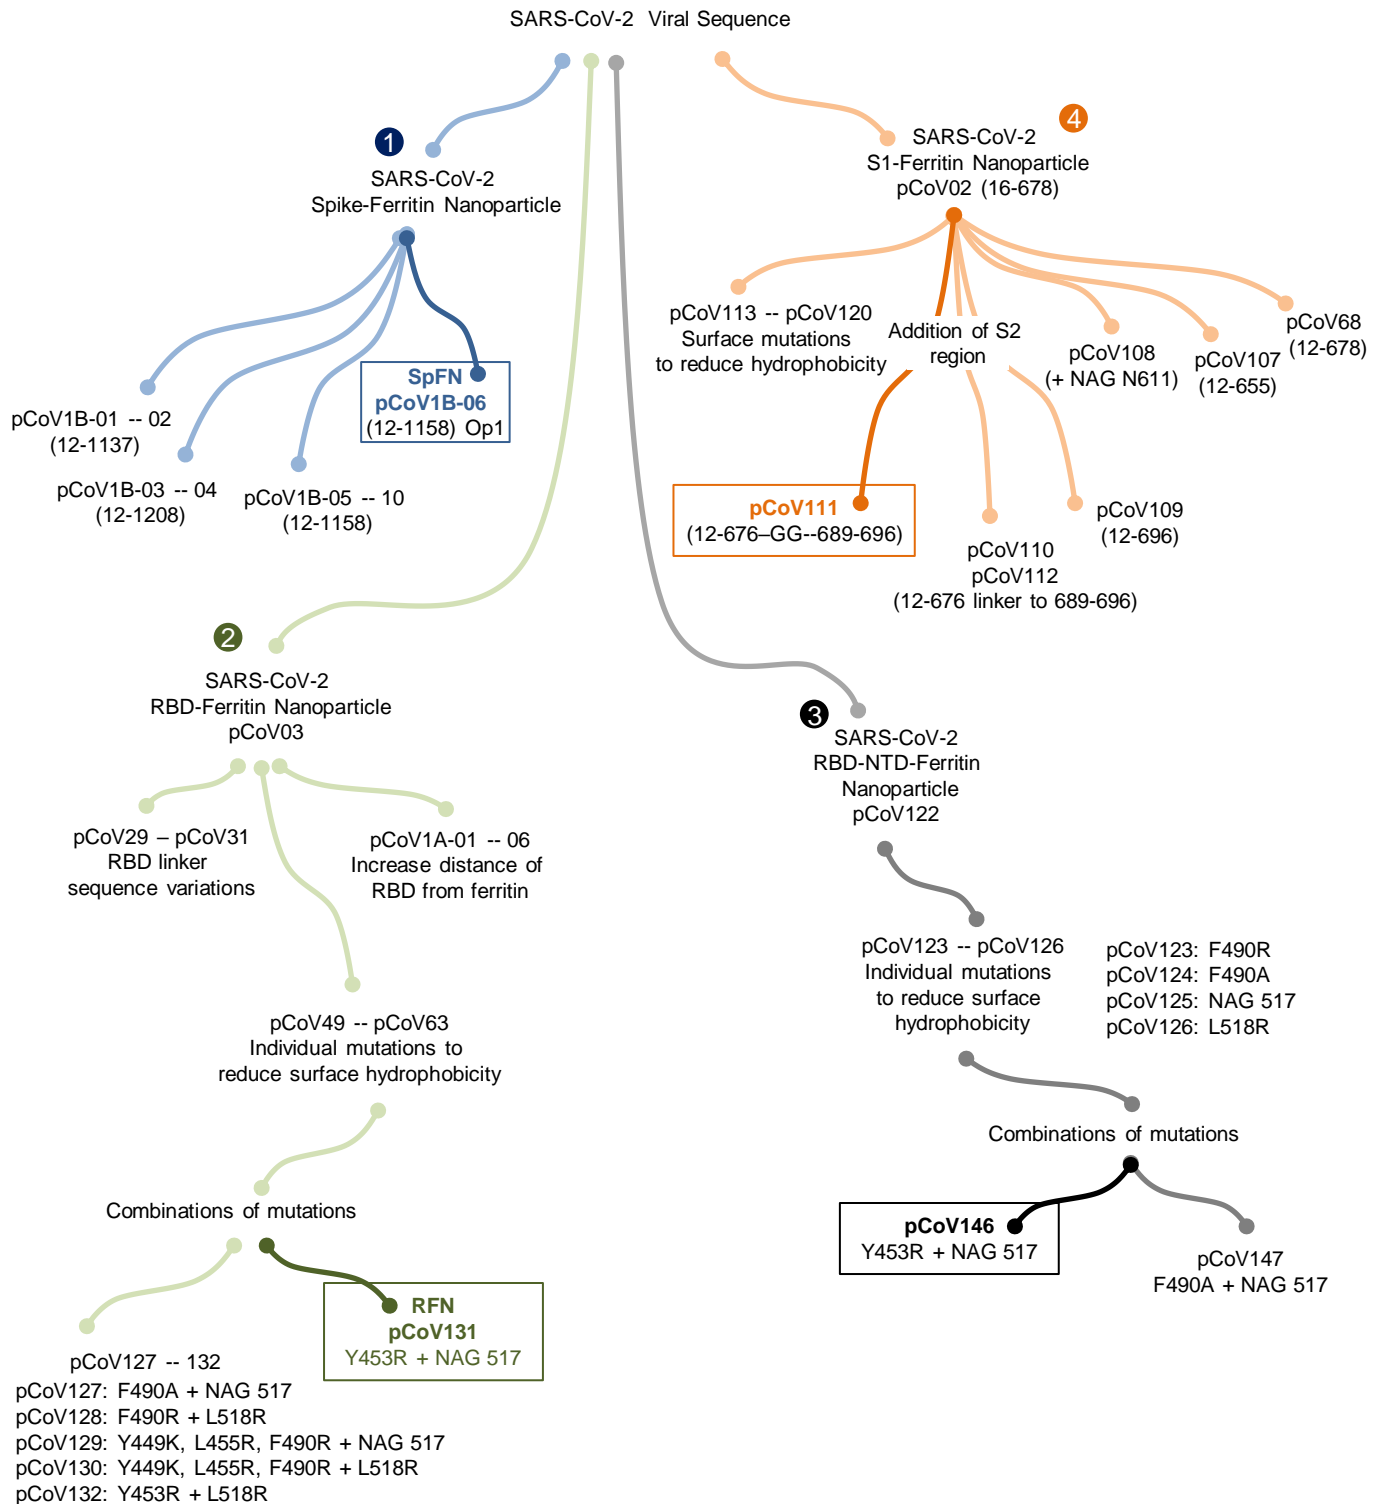

**Figure S1. Structure-based design of SARS-CoV-2 S-domain ferritin nanoparticle immunogens and design pipeline. Related to Figure 1.**

Four ferritin nanoparticle immunogen designs were developed focused on (1) Spike ferritin nanoparticles (blue), (2) RBD ferritin nanoparticles (green), (3) RBD-NTD ferritin nanoparticles (black), and (4) S1 ferritin nanoparticles (orange). The design iterations and concepts are indicated, along with select mutations and design name. Lead vaccine candidates from each category are highlighted.

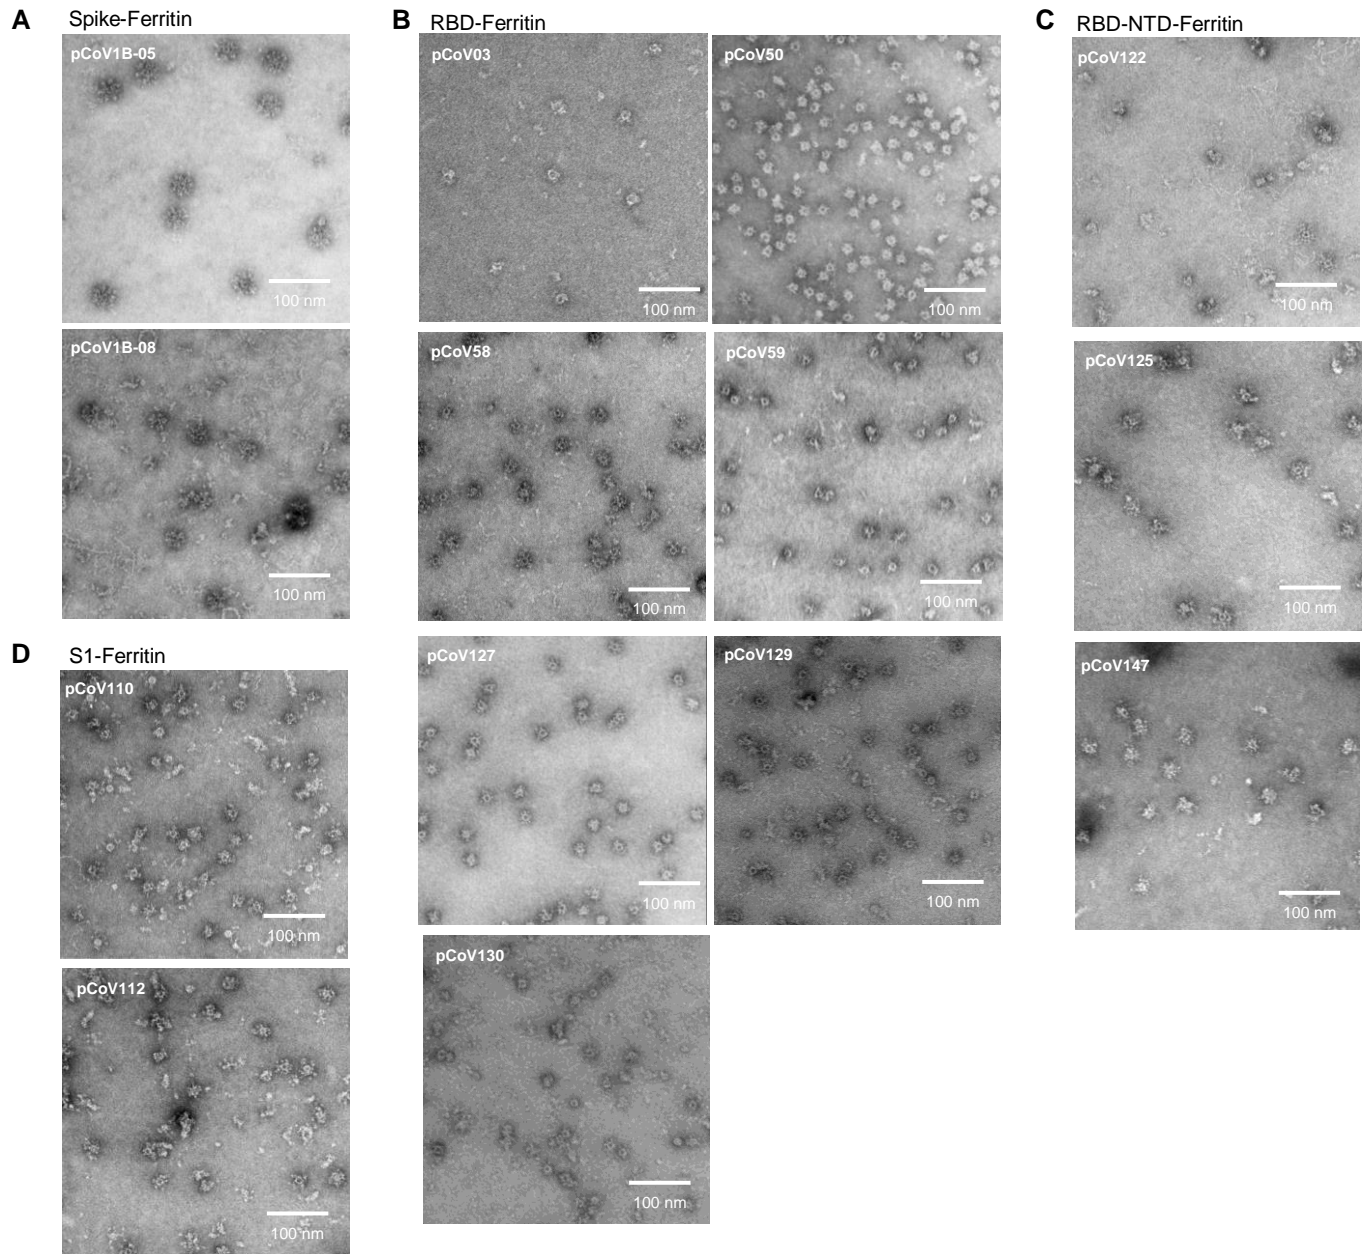

**Figure S2. Negative-stain electron microscopy 2D micrographs of SARS-CoV-2 ferritin nanoparticle vaccine candidates. Related to Figure 2 and 4.**

Negative-stain electron microscopy 2D micrographs. The white scale bars represent 100 nm.

(A) Spike ferritin nanoparticles pCoV1B-05 and pCoV1B-08.

(B) RBD ferritin nanoparticles pCoV03, pCoV50, pCoV58, pCoV59, pCoV127, pCoV129, pCoV130, pCoV131

(C) RBD-NTD ferritin nanoparticles pCoV122, pCoV125, pCoV147

(D) S1 ferritin nanoparticle pCoV110 and pCoV112.

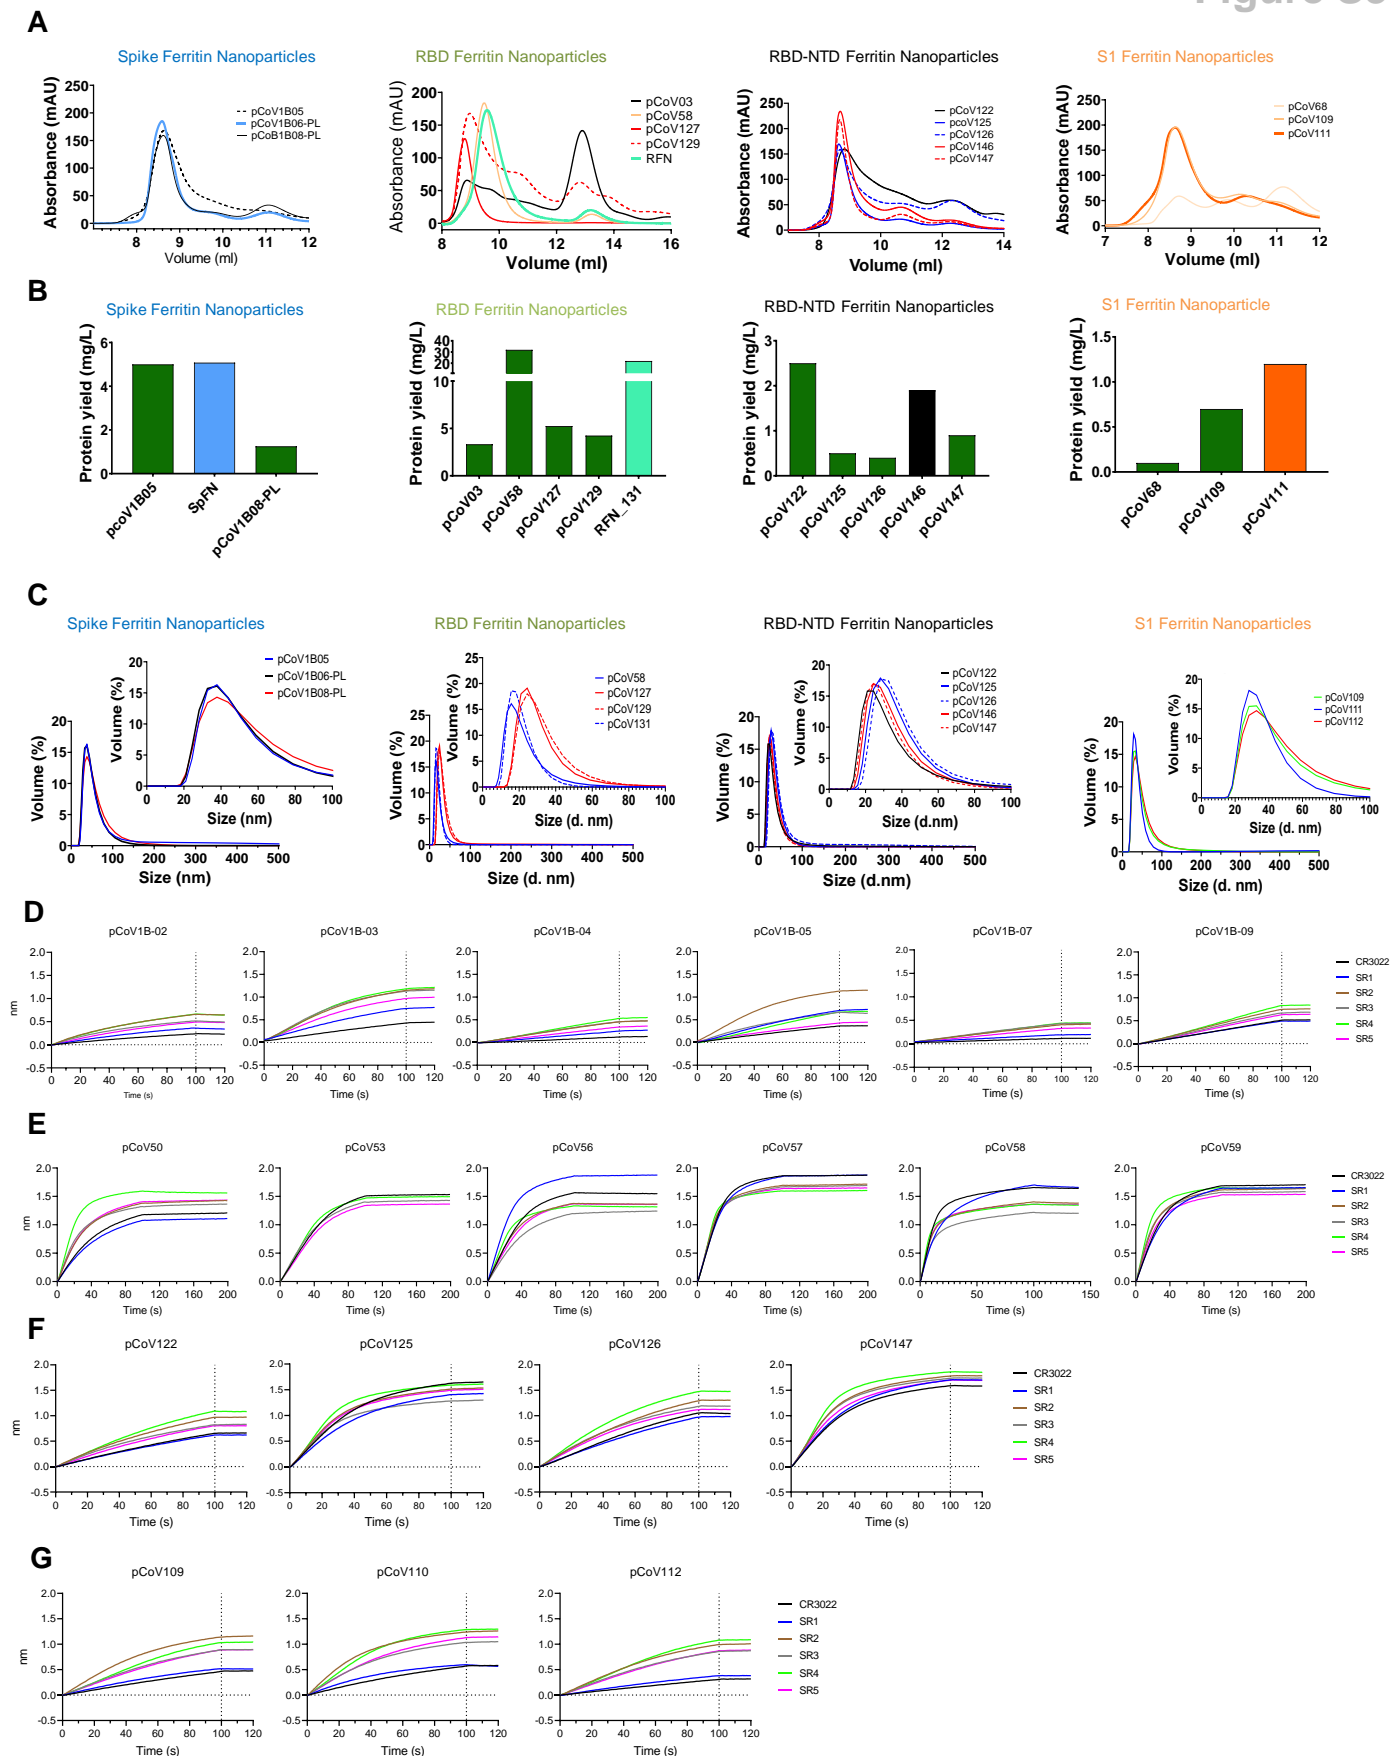

**Figure S3. Biophysical and antigenic characterization of S-domain ferritin nanoparticle immunogens. Related to Figure 2 and 3.**

- (A) Size-exclusion chromatography on a Superdex S200 10/300 column of representative SARS-CoV-2 S-based ferritin nanoparticles from the four design categories.
- (B) Expression levels (mg/L supernatant) of representative SARS-CoV-2 Spike-based ferritin nanoparticles.
- (C) Dynamic light scattering analysis of representative SARS-CoV-2 Spike-based ferritin nanoparticles.
- (D) Spike ferritin nanoparticles (E) RBD ferritin, (F) RBD-NTD ferritin and (G) S1 ferritin nanoparticles were assessed for binding to a set of neutralizing antibodies (concentration = 30  $\mu$ g/ml) by biolayer interferometry.

Figure S4

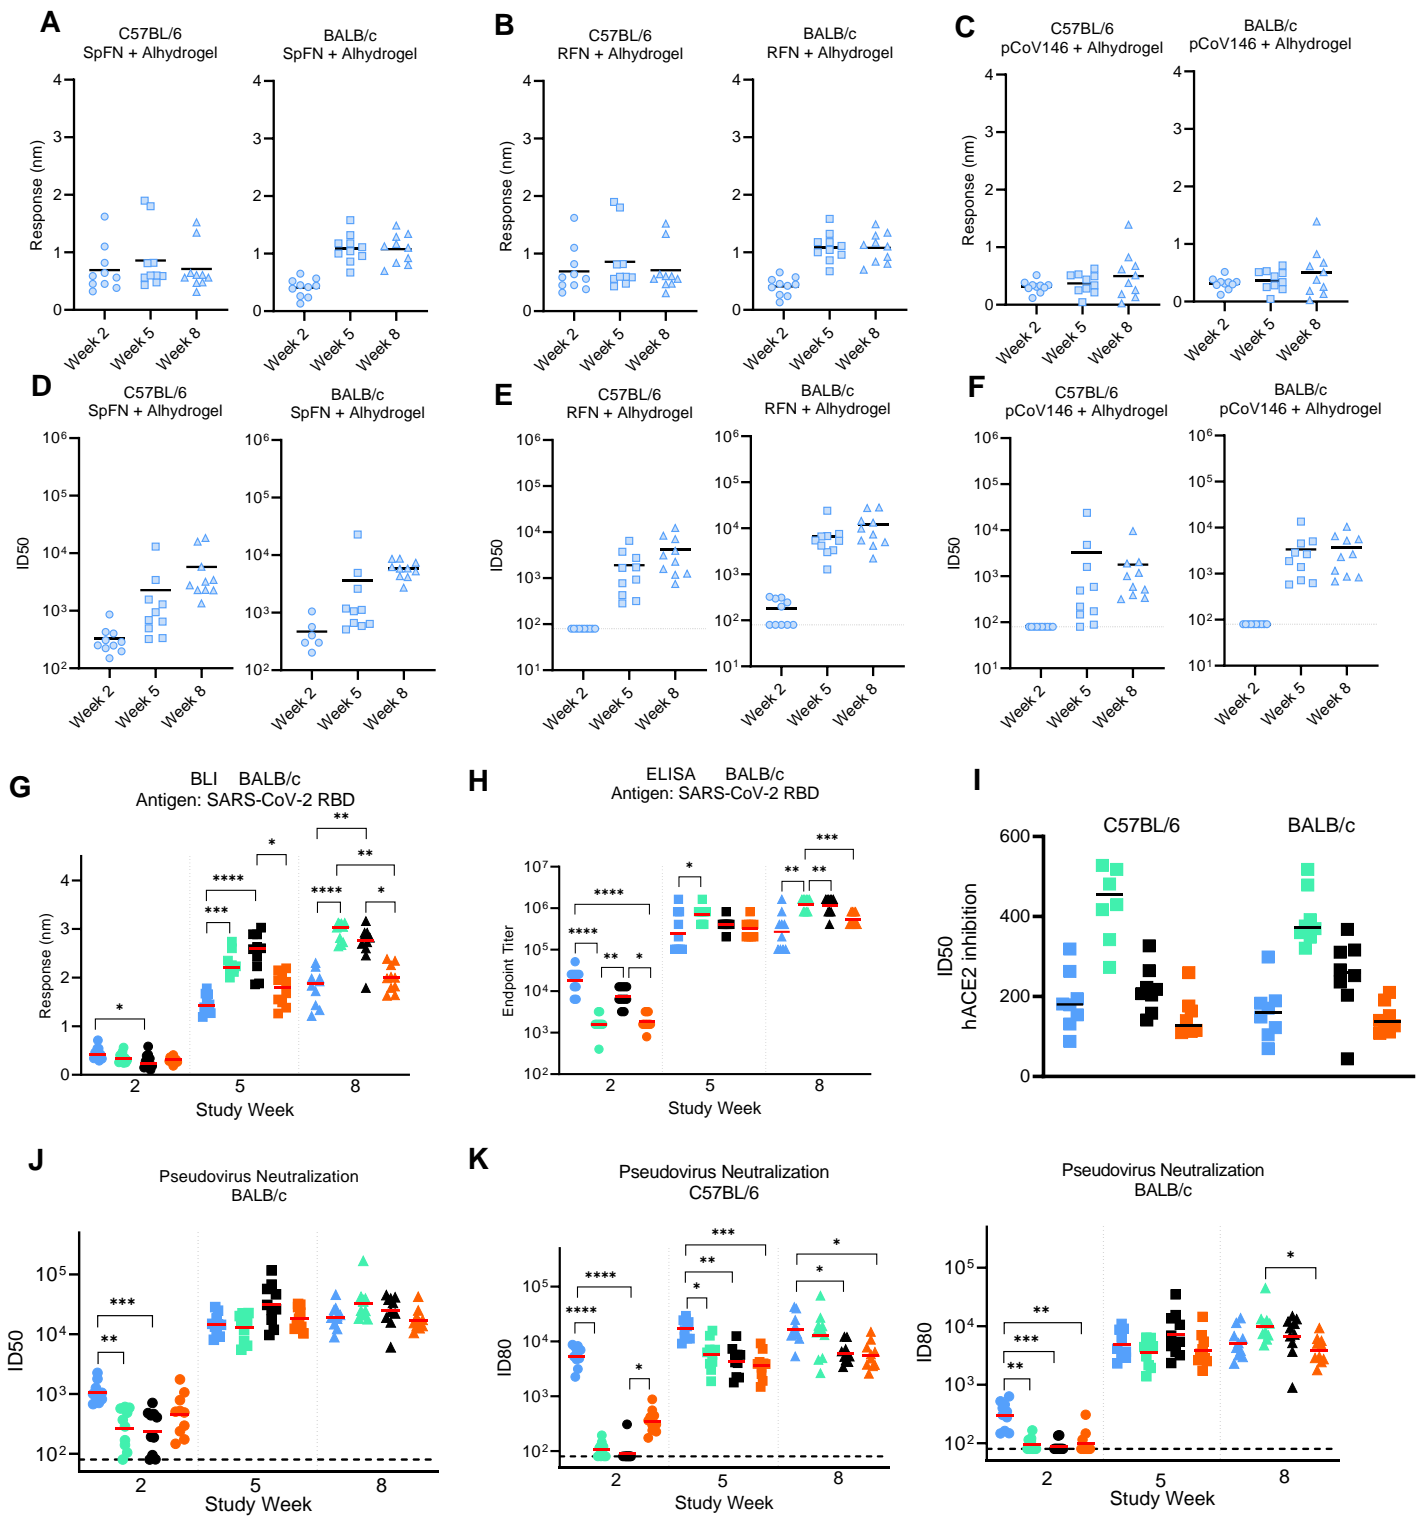

**Figure S4 SARS-CoV-2 nanoparticle vaccine candidates elicit robust binding and pseudovirus neutralizing antibody responses in mice. Related to Figure 5 and 7.**

Data relating to each category of immunogen are colored as follows: SpFN (blue), RFN (green), pCoV146 (black) and pCoV111 (orange). N = 10/group.

(A) Biolayer Interferometry binding analysis of C57BL/6 and BALB/c sera from mice immunized with SpFN + Alhydrogel® (B) RFN + Alhydrogel® and (C) pCoV146 + Alhydrogel® to SARS-CoV-2 RBD. Mean values are indicated by a horizontal line, n=10.

(D) Pseudovirus neutralization (ID<sub>50</sub> values) of C57BL/6 and BALB/c sera from mice immunized with SpFN + Alhydrogel® (E) RFN + Alhydrogel® and (F) pCoV146 + Alhydrogel®. Geometric mean values are indicated by a horizontal line, n=10.

(G) Biolayer interferometry analysis of BALB/c mouse sera binding to SARS-CoV-2 RBD at study weeks 2, 5 and 8. Mice were immunized with the four lead candidate vaccines SpFN (blue), RFN (green), pCoV146 (black) and pCoV111 (orange). Binding mean values are indicated by a horizontal line, n=10, sera responses at a given study week were compared for statistical differences using a Kruskal-Wallis test followed by a Dunn's post-test.

(H) ELISA analysis of BALB/c mice immune responses as indicated in (G). Binding geometric mean values of the endpoint titers are indicated by a horizontal line, n=10, sera responses at a given study week were compared for statistical differences using a Kruskal-Wallis test followed by a Dunn's post-test.

(I) ACE2 blocking assay ID50 inhibition titers of study week 10 mouse sera from C57BL/6 mice (left) and BALB/c mice (right) immunized with the four lead immunogens from each design category (colored as in Figure 5).

(J) Pseudovirus neutralization ID50 titers of BALB/c mice immunized as indicated in (G). Geometric mean values are indicated by a horizontal line, n=10, sera neutralization titers at a given study week for the four immunogens were compared for statistical differences using a Kruskal-Wallis test followed by a Dunn's post-test.

(K) Pseudovirus neutralization ID<sub>80</sub> titers of C57BL/6 (left) and BALB/c mice (right) immunized as indicated in (G). Geometric mean values are indicated by a horizontal line, n=10, sera neutralization titers at a given study week for the four immunogens were compared for statistical differences using a Kruskal-Wallis test followed by a Dunn's post-test.

P values <0.0001 (\*\*\*\*), <0.001 (\*\*\*), <0.01 (\*\*) or <0.05 (\*).

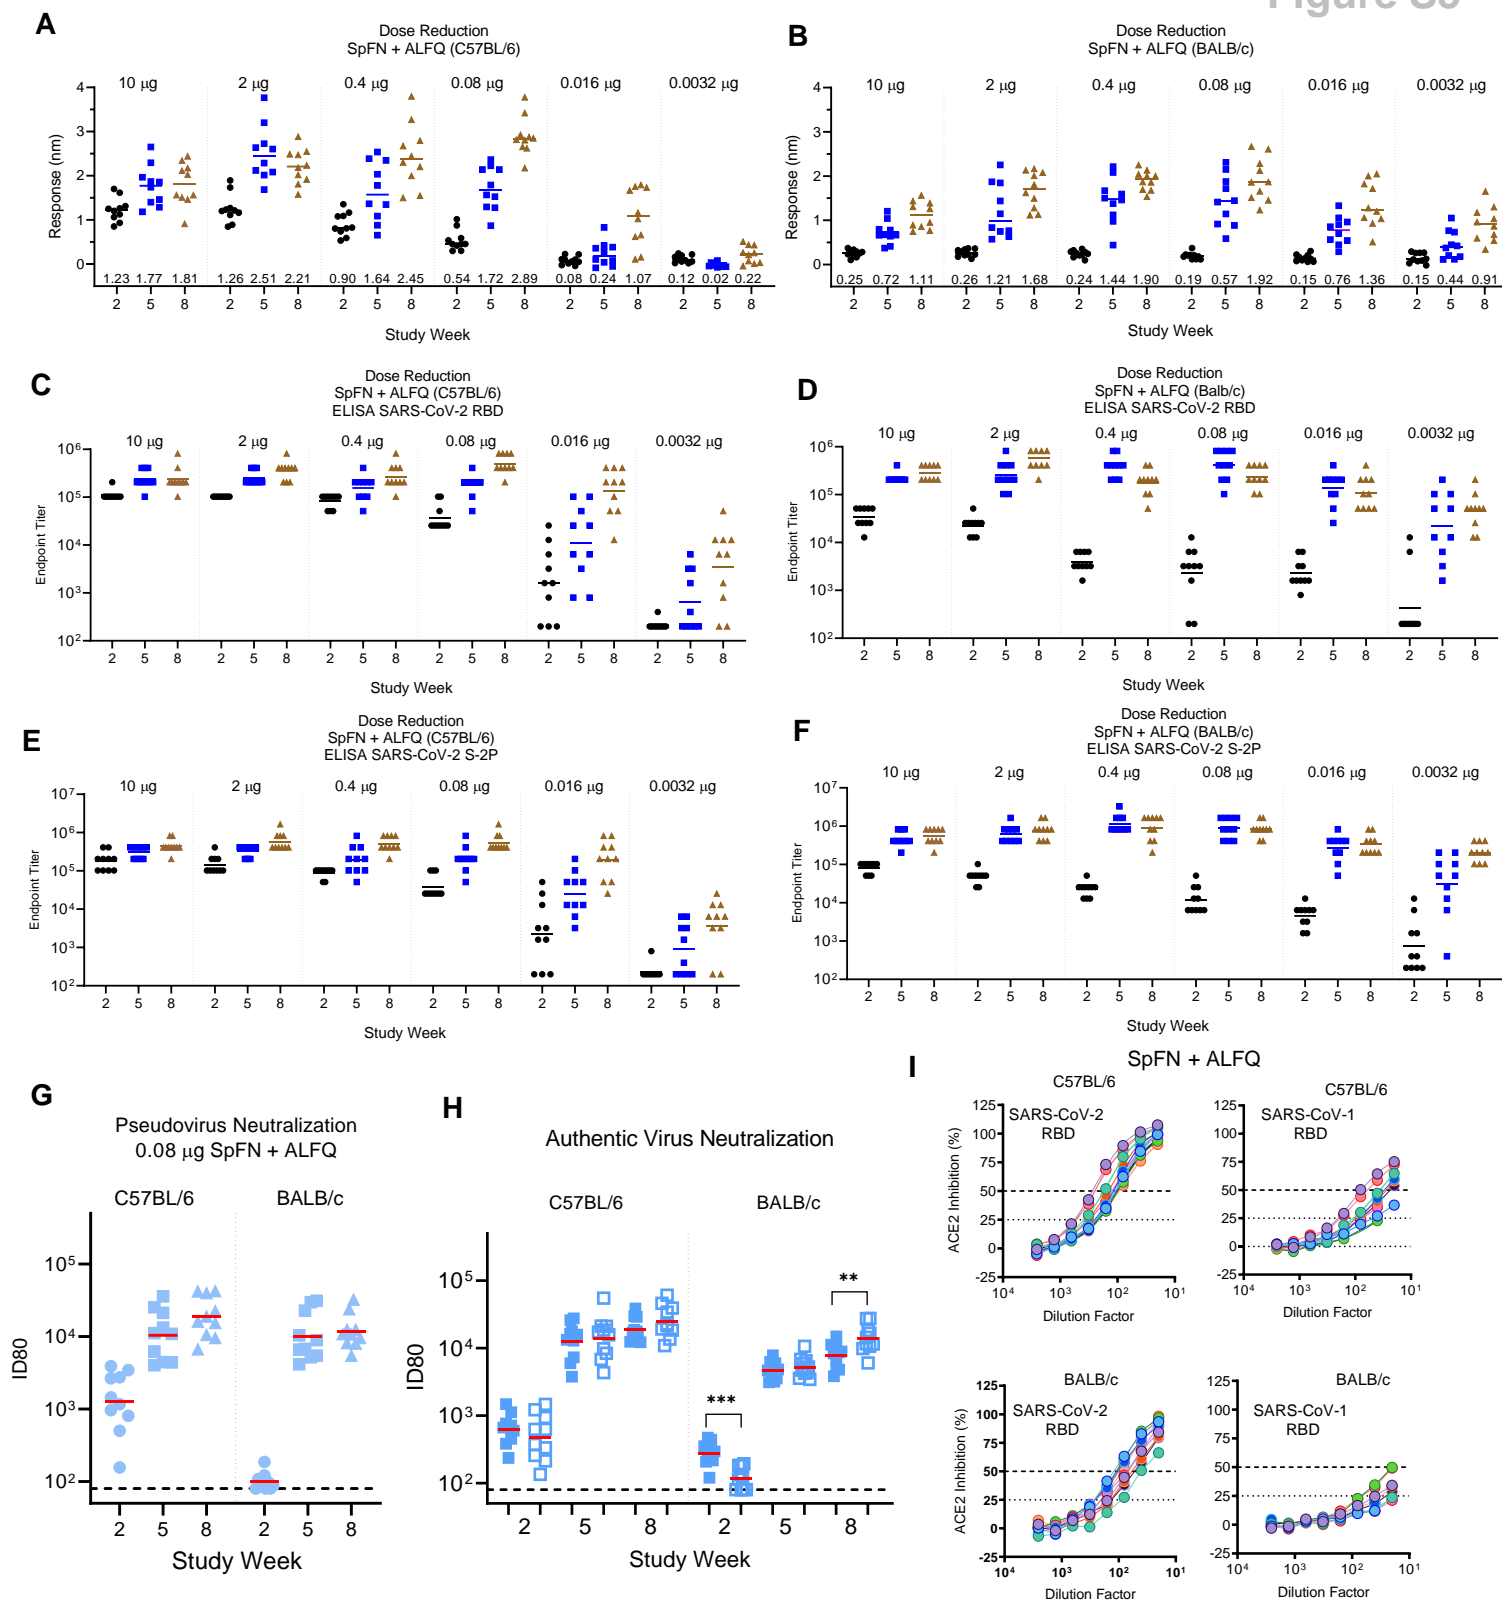

**Figure S5 SARS-CoV-2 SpFN vaccine candidate elicits robust binding and neutralizing antibody responses at reduced doses in mice. Related to Figure 5 and 7.**

(A) Biolayer interferometry analysis of C57BL/6 and (B) BALB/c mouse sera binding response to SARS-CoV-2 RBD following immunization with reducing doses of SpFN.

(C, E) ELISA analysis of C57BL/6 and (D, F) BALB/c mouse sera binding response to SARS-CoV-2 RBD or S-2P following immunization with reducing doses of SpFN.

(G) SARS-CoV-2 pseudovirus ID80 neutralization titers of mice immunized with 0.08 µg SpFN + ALFQ.

(H) Authentic SARS-CoV-2 virus ID80 neutralization titers of mice immunized with 10 µg (blue) or 0.08 µg (light blue) SpFN + ALFQ. Geometric mean titers for each group and time point are indicated by a horizontal line, n = 10. Neutralization titers for the two dose groups at each study time point were compared for statistically significant differences using a Mann-Whitney unpaired two-tailed non-parametric test. The two BALB/c time points that showed differences are indicated by bars. P values < 0.001 (\*\*\*), < 0.01 (\*\*).

(I) Mouse sera from study week 10 was analyzed for hACE2 blocking capacity to SARS-CoV-2 RBD (left) or SARS-CoV-1 RBD using a biolayer interferometry assay format.

A

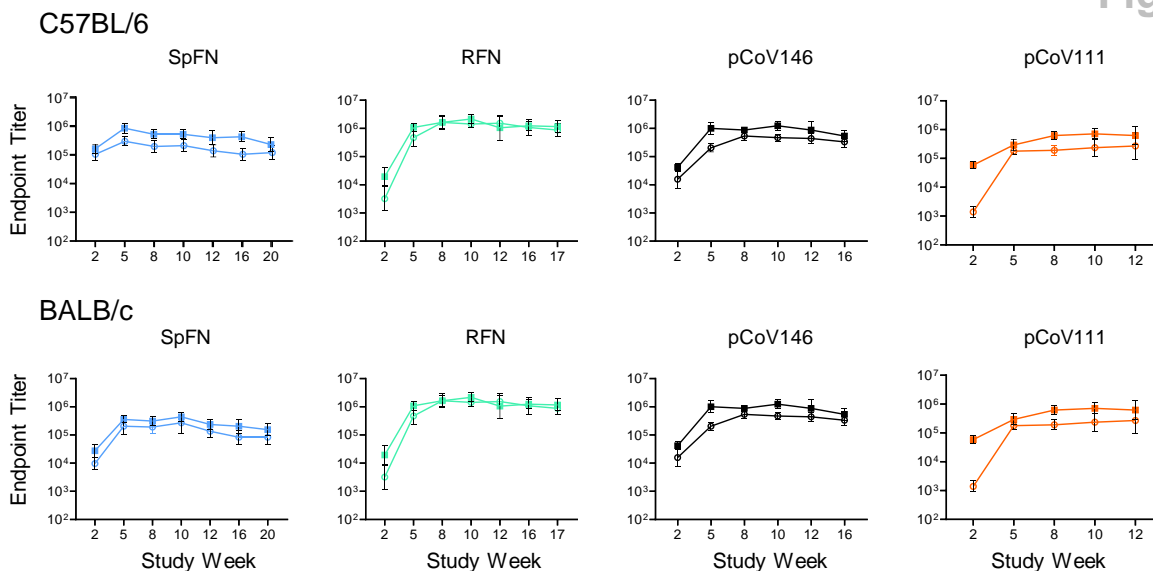

B

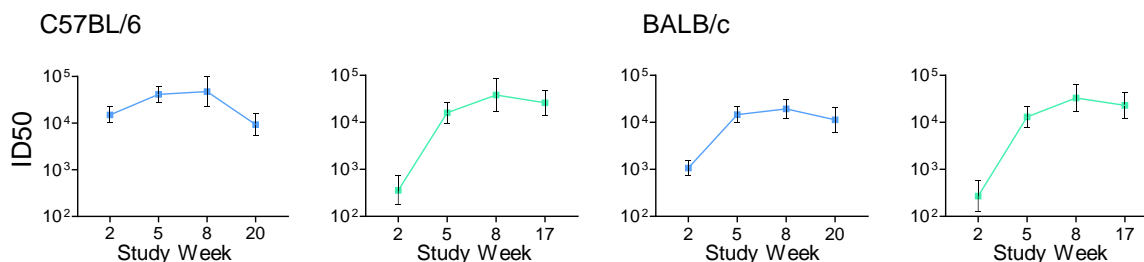

C

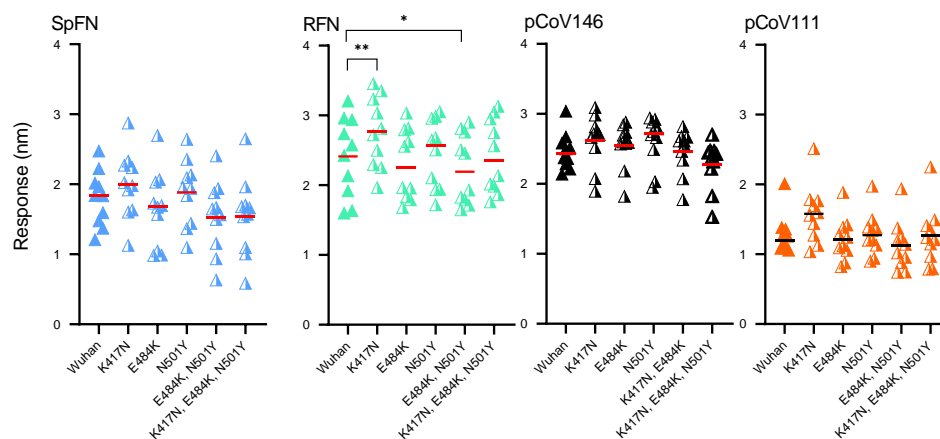

D

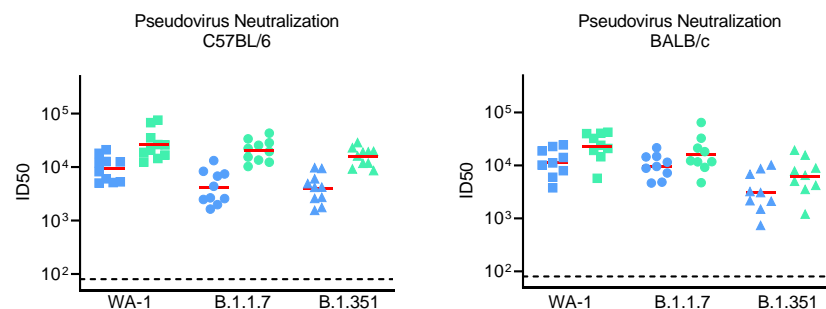

**Figure S6. SARS-CoV-2 S-domain ferritin nanoparticle vaccine candidates elicit durable binding and neutralizing antibody responses. Related to Figure 5 and 7.**

(A) ELISA binding of mouse sera to S-2P and RBD antigens (Square: S-2P; Circle: RBD). Sera samples up to week 20 of the mouse studies were assessed for durability of binding responses.

(B) Pseudovirus neutralization ID50 values of SARS-CoV-2 by mouse sera following SpFN (blue) or RFN (green) immunization at multiple timepoints. Samples were assessed from both C57BL/6 or BALB/c mice.

(C) Bi-layer Interferometry binding of study week 10 immunized C57BL/6 mouse serum to SARS-CoV-2 RBD, and SARS-CoV-2 RBD variants. Immunogens are indicated at the top left of each graph. Mean values are indicated by a horizontal line,  $n=10$ , Significance was assessed using a Kruskal-Wallis test followed by a Dunn's post-test.

(D) Pseudovirus ID50 neutralization of SARS-CoV-2 VoC by immune sera from study week 20 for SpFN-immunized, or study week 17 for RFN-immunized mice



Figure S7

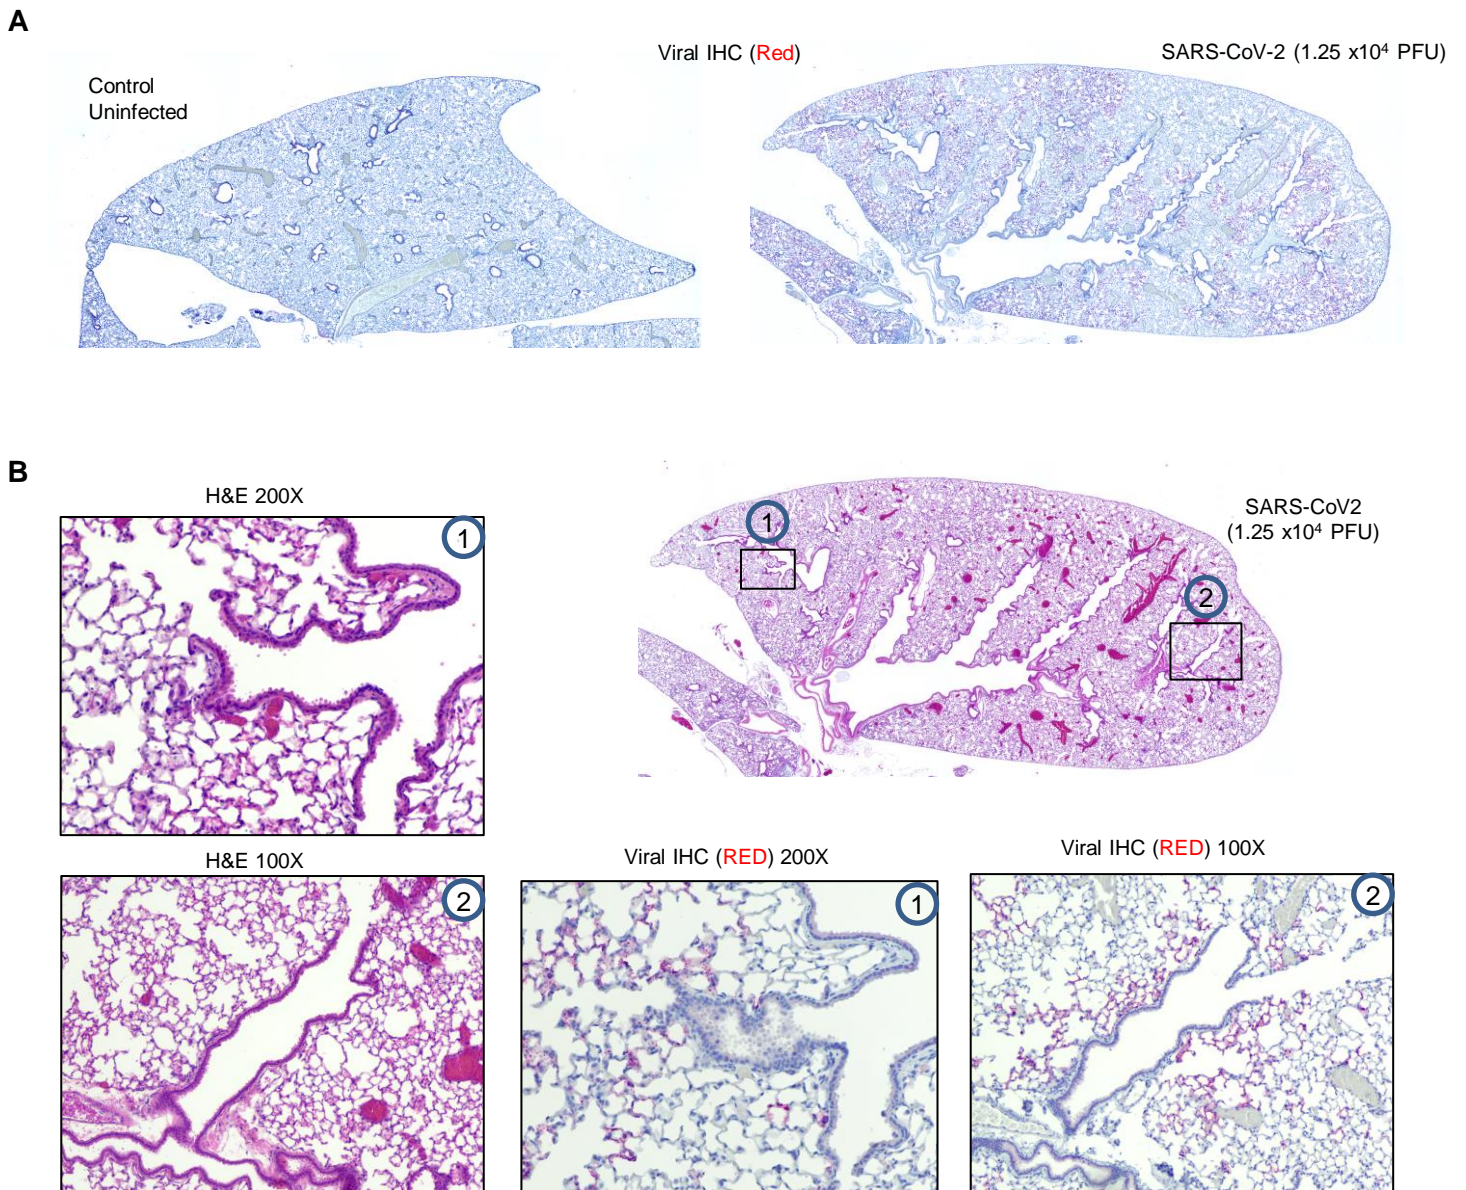

**Figure S7 Histopathological analysis of SARS-CoV-2 infection in K18-ACE2 mice. Related to Figure 7**

(A, B) Hematoxylin and eosin staining of lung sections from K18-hACE2 mice following intranasal infection with  $1.25 \times 10^4$  PFU SARS-CoV-2. Images show two magnifications. Images are representative of  $n = 10$  per group.

**Table S1. Spike-domain ferritin immunogens, Related to Figure 1.**

| Spike-Ferritin (all based on S-2P variant with Dfurin and PP) |                                         |                                                                                                       |        |
|---------------------------------------------------------------|-----------------------------------------|-------------------------------------------------------------------------------------------------------|--------|
| Construct ID                                                  | Description                             |                                                                                                       |        |
| pCoV1B-01                                                     | S2P(1-1137)-del-4-Ferritin              | Shortened ectodomain - no coiled coil (closest to flu HA pass off)                                    | NL     |
| pCoV1B-02                                                     | S2P(1-1137)-del-6-Ferritin              | Shortened ectodomain - no coiled coil (closest to flu HA pass off)                                    | NL     |
| pCoV1B-03                                                     | S2P(1-1208)-del-Ferritin                | Full ectodomain                                                                                       | NL     |
| pCoV1B-04                                                     | S2P(1-1208)-GCN4-Ferritin               | Full ectodomain with GCN4                                                                             | NL     |
| pCoV1B-05                                                     | S2P(1-1154)-del-Ferritin                | Shortened ectodomain with ending with a couple turns of coiled coil                                   | NL     |
| pCoV1B-06                                                     | S2P(1-1158)op1-del-Ferritin             | Optimized HR ending (end on glycan N1158)                                                             | NL     |
| pCoV1B-07                                                     | S2P(1-1158)op2-del-Ferritin             | Optimized HR ending (Ile) (end on glycan N1158)                                                       | NL     |
| pCoV1B-08                                                     | S2P(1-1158)op1x2-del-Ferritin           | Optimized HR ending (N1158 glycan removed, but exists on the repeated HR)                             | NL     |
| pCoV1B-09                                                     | S2P(1-1158)op2x2-del-Ferritin           | Optimized HR ending (Ile) (N1158 glycan removed, but exists on the repeated HR)                       | NL     |
| pCoV1B-10                                                     | S2P(1-1158)op1-fGCN4-del-Ferritin       | Optimized HR ending with GCN4 fused in register (no glycan N1158)                                     | NL     |
| pCoV1B-01-PL                                                  | PL-S2P(12-1137)-del-4-Ferritin          | Shortened ectodomain - no coiled coil (closest to flu HA pass off)                                    | PL     |
| pCoV1B-02-PL                                                  | PL-S2P(12-1137)-del-6-Ferritin          | Shortened ectodomain - no coiled coil (closest to flu HA pass off)                                    | PL     |
| pCoV1B-03-PL                                                  | PL-S2P(12-1208)-del-Ferritin            | Full ectodomain                                                                                       | PL     |
| pCoV1B-04-PL                                                  | PL-S2P(12-1208)-GCN4-Ferritin           | Full ectodomain with GCN4                                                                             | PL     |
| pCoV1B-05-PL                                                  | PL-S2P(12-1154)-del-Ferritin            | Shortened ectodomain with ending with a couple turns of coiled coil                                   | PL     |
| pCoV-1B-06-PL (aka SpFN)                                      | PL-S2P(12-1158)op1-del-Ferritin         | Optimized HR ending (end on glycan N1158)                                                             | PL     |
| pCoV1B-07-PL                                                  | PL-S2P(12-1158)op2-del-Ferritin         | Optimized HR ending (Ile) (end on glycan N1158)                                                       | PL     |
| pCoV1B-08-PL                                                  | PL-S2P(12-1158)op1x2-del-Ferritin       | Optimized HR ending (N1158 glycan removed, but exists on the repeated HR)                             | PL     |
| pCoV1B-09-PL                                                  | PL-S2P(12-1158)op2x2-del-Ferritin       | Optimized HR ending (Ile) (N1158 glycan removed, but exists on the repeated HR)                       | PL     |
| pCoV1B-10-PL                                                  | PL-S2P(12-1158)op1-fGCN4-del-Ferritin   | Optimized HR ending with GCN4 fused in register (no glycan N1158)                                     | PL     |
| RBD-Ferritin                                                  |                                         |                                                                                                       |        |
| Construct ID                                                  | Description                             | Comment                                                                                               | Leader |
| pCoV03                                                        | His8-3C-RBD(331-527)-Ferritin           | N-terminal His8 with HRV-3C cleavage site, GSGGGG linker between RBD and Ferritin                     | PL     |
| pCoV29                                                        | His8-3C-RBD-3-Ferritin                  | SGG linker                                                                                            | PL     |
| pCoV30                                                        | His8-3C-RBD-3-del-Ferritin              | SGG linker, D first 10 residues in ferritin, then DIEK changed to DIIK                                | PL     |
| pCoV31                                                        | His8-3C-RBD-6-del-Ferritin              | P527G, D first 8 residues in ferritin, then SKDIEK changed to DIIK                                    | PL     |
| pCoV1A-01                                                     | His8-3C-RBD-PPII-Ferritin               | Extend distance between RBD and ferritin - using polyproline Helix                                    | PL     |
| pCoV1A-02                                                     | His8-3C-RBD-alpha1-Ferritin             | Extend distance between RBD and ferritin - using alpha Helix from bottom of S protein                 | PL     |
| pCoV1A-03                                                     | His8-3C-RBD-alpha2-Ferritin             | Extend distance between RBD and ferritin- using alpha Helix from bottom of S protein                  | PL     |
| pCoV1A-04                                                     | His8-3C-RBD-GCN4-del-Ferritin           | Extend distance between RBD and ferritin + stabilize ferritin - using GCN4 trimerization motif        | PL     |
| pCoV1A-05                                                     | His8-3C-RBD-1141_1158op1-del-Ferritin   | Extend distance between RBD and ferritin + stabilize ferritin - using semi-native trimerization motif | PL     |
| pCoV1A-06                                                     | His8-3C-RBD-1141_1158op1x2-del-Ferritin | Extend distance between RBD and ferritin + stabilize ferritin - using semi-native trimerization motif | PL     |

**Table S1. Spike-domain ferritin immunogens (continued)**

| RBD-Ferritin (continued) |                                                          |                                                                                                                      |        |
|--------------------------|----------------------------------------------------------|----------------------------------------------------------------------------------------------------------------------|--------|
| Construct ID             | Description                                              | Comment                                                                                                              | Leader |
| pCoV49                   | His8-3C-RBD-F456N/K458T-Ferritin                         | RBD with indicated point mutations                                                                                   | PL     |
| pCoV50                   | His8-3C-RBD-L455R/Y449K/F490R-Ferritin                   | RBD with indicated point mutations                                                                                   | PL     |
| pCoV51                   | His8-3C-RBD-L455R-Ferritin                               | RBD with indicated point mutation                                                                                    | PL     |
| pCoV52                   | His8-3C-RBD-I468R-Ferritin                               | RBD with indicated point mutation                                                                                    | PL     |
| pCoV53                   | His8-3C-RBD-Y453R-Ferritin                               | RBD with indicated point mutation                                                                                    | PL     |
| pCoV54                   | His8-3C-RBD-L452R-Ferritin                               | RBD with indicated point mutation                                                                                    | PL     |
| pCoV55                   | His8-3C-RBD-L492R-Ferritin                               | RBD with indicated point mutation                                                                                    | PL     |
| pCoV56                   | His8-3C-RBD-F490R-Ferritin                               | RBD with indicated point mutation                                                                                    | PL     |
| pCoV57                   | His8-3C-RBD-F490A-Ferritin                               | RBD with indicated point mutation                                                                                    | PL     |
| pCoV58                   | His8-3C-RBD-L517N/L518K/H519S-Ferritin                   | RBD with indicated point mutations                                                                                   | PL     |
| pCoV59                   | His8-3C-RBD-L518R-Ferritin                               | RBD with indicated point mutation                                                                                    | PL     |
| pCoV60                   | His8-3C-RBD-V367T/L335N-Ferritin                         | RBD with indicated point mutations                                                                                   | PL     |
| pCoV61                   | His8-3C-RBD-T385N/L387T-Ferritin                         | RBD with indicated point mutations                                                                                   | PL     |
| pCoV62                   | His8-3C-RBD-V382R-Ferritin                               | RBD with indicated point mutation                                                                                    | PL     |
| pCoV63                   | His8-3C-RBD-F377R-Ferritin                               | RBD with indicated point mutation                                                                                    | PL     |
| pCoV127                  | His8-3C-RBD-F490A/L518N/L519K/H520S-Ferritin             | RBD with indicated point mutations                                                                                   | PL     |
| pCoV128                  | His8-3C-RBD-F490A/L518R-Ferritin                         | RBD with indicated point mutations                                                                                   | PL     |
| pCoV129                  | His8-3C-RBD-L455R/Y449K/F490R/L517N/L518K/H519S-Ferritin | RBD with indicated point mutations                                                                                   | PL     |
| pCoV130                  | His8-3C-RBD-L455R/Y449K/F490R/L518R-Ferritin             | RBD with indicated point mutations                                                                                   | PL     |
| pCoV131 (aka RFN)        | His8-3C-RBD-Y453R/L517N/L518K/H519S-Ferritin             | RBD with indicated point mutations                                                                                   | PL     |
| pCoV132                  | His8-3C-RBD-Y453R/L518R-Ferritin                         | RBD with indicated point mutations                                                                                   | PL     |
| RBD-NTD-Ferritin         |                                                          |                                                                                                                      |        |
| Construct ID             | Description                                              | Comment                                                                                                              | Leader |
| pCoV122                  | His8-3C-RBD(331-527)-GSGGSG-NTD(12-303)-Ferritin         | N-terminal His8 with HRV-3C cleavage site, GSGGSG linker between RBD and NTD, GSGGGG linker between NTD and Ferritin | PL     |
| pCoV123                  | His8-3C-RBD-F490R-NTD-Ferritin                           | RBD with indicated point mutation                                                                                    | PL     |
| pCoV124                  | His8-3C-RBD-F490A-NTD-Ferritin                           | RBD with indicated point mutation                                                                                    | PL     |
| pCoV125                  | His8-3C-RBD-L517N/L518K/H519S-NTD-Ferritin               | RBD with indicated point mutations                                                                                   | PL     |
| pCoV126                  | His8-3C-RBD-L518R-NTD-Ferritin                           | RBD with indicated point mutation                                                                                    | PL     |
| pCoV146                  | His8-3C-RBD-Y453R-L517N/L518K/H519S-NTD-Ferritin         | RBD with indicated point mutations                                                                                   | PL     |
| pCoV147                  | His8-3C-RBD-F490A-L517N/L518K/H519S-NTD-Ferritin         | RBD with indicated point mutations                                                                                   | PL     |

**Table S1. Spike-domain ferritin immunogens (continued)**

| S1-Ferritin  |                                    |                                                                                                    |    |
|--------------|------------------------------------|----------------------------------------------------------------------------------------------------|----|
| Construct ID | Description                        |                                                                                                    |    |
| pCoV68       | S1(12-678)-Ferritin                | GSGGSG linker between S1 and Ferritin                                                              | PL |
| pCoV107      | S1(12-655)-Ferritin                | 24 residues removed from the C-terminus                                                            | PL |
| pCoV108      | S1(12-655)-L611N/Q613T-Ferritin    | 24 residues removed from the C-terminus, S1 with indicated point mutations                         | PL |
| pCoV109      | S1(12-696)-Ferritin                | Extended the sequence to include a portion of S2                                                   | PL |
| pCoV110      | S1(12-676)-G-S2(689-696)-Ferritin  | Extended the sequence to include a portion of S2 with the indicated leader between the two regions | PL |
| pCoV111      | S1(12-676)-GG-S2(689-696)-Ferritin | Extended the sequence to include a portion of S2 with the indicated leader between the two regions | PL |
| pCoV112      | S1(12-676)-PG-S2(689-696)-Ferritin | Extended the sequence to include a portion of S2 with the indicated leader between the two regions | PL |
| pCoV113      | S1-Y312N/Q313Y/T314T-Ferritin      | S1 with indicated point mutations                                                                  | PL |
| pCoV114      | S1-I651N/A653S-Ferritin            | S1 with indicated point mutations                                                                  | PL |
| pCoV115      | S1-S316C/V595C-Ferritin            | S1 with indicated point mutations                                                                  | PL |
| pCoV116      | S1-V320C/S591C-Ferritin            | S1 with indicated point mutations                                                                  | PL |
| pCoV117      | S1-L560Q/F562H-Ferritin            | S1 with indicated point mutations                                                                  | PL |
| pCoV118      | S1-F562N/Q564T-Ferritin            | S1 with indicated point mutations                                                                  | PL |
| pCoV119      | S1-F490R-Ferritin                  | S1 with indicated point mutation                                                                   | PL |
| pCoV120      | S1-F490A-Ferritin                  | S1 with indicated point mutation                                                                   | PL |
| pCoV02       | S1(16-678)-Ferritin                | 4 residues removed from N-terminus                                                                 | PL |
| pCoV67       | His8-3C-S1-Ferritin                | His8 and HRV-3C cleavage site added to N-terminus                                                  | PL |

**Table S2. Negative-stain Electron Microscopy Data Collection and Refinement, Related to Figure 4.**

| Protein                         | SpFN_1B-06-PL | RFN_131    | pCoV146    | pCoV111    | pCoV1B-05   |
|---------------------------------|---------------|------------|------------|------------|-------------|
| Immunogen Fused                 | Spike (S2P)   | RBD        | RBD-NTD    | S1         | Spike (S2P) |
| EMDB Code                       | EMD-25448     | EMD-25449  | EMD-25450  | EMD-25451  | N/A         |
| <b>Data Collection</b>          |               |            |            |            |             |
| Microscope                      | Tecnai T20    | Tecnai T20 | Tecnai T20 | Tecnai T20 | Talos L120C |
| Voltage (kV)                    | 200 kV        | 200 kV     | 200 kV     | 200 kV     | 120 kV      |
| Camera                          | Eagle 4K      | Eagle 4K   | Eagle 4K   | Eagle 4K   | Ceta        |
| Software                        | SerialEM      | SerialEM   | SerialEM   | SerialEM   | EPU         |
| Pixel Size (Å/pix)              | 2.195         | 2.195      | 2.195      | 2.195      | 2.542       |
| Underfocus range                | 0.7-1.3       | 0.8-1.3    | 0.6-1.5    | 0.8-1.6    | 0.5-0.9     |
| <b>Image Processing</b>         |               |            |            |            |             |
| Software                        | RELION        | RELION     | RELION     | RELION     | RELION      |
|                                 | 3.0.8         | 3.0.8      | 3.0.8      | 3.0.8      | 3.1.1       |
| # Particle Images               | 11502         | 3383       | 832        | 2121       | 2143        |
| Pixel Size (Å/pixel)            | 4.39          | 4.39       | 4.39       | 4.39       | 5.084       |
| Box Size (pixels)               | 160           | 160        | 160        | 160        | 200         |
| Symmetry (3D)                   | O             | O          | O          | O          | --          |
| Initial Lowpass (Å)<br>(RELION) | 100           | 80         | 100        | 100        | --          |
| Resolution (Å)                  | 25            | 21         | 30         | 30         | --          |

**Table S3. Mouse immunogenicity study immunogens, adjuvants, and mouse type, Related to Figure 5.**

| pCOV no.                           | Immunogen design        | C57BL/6 ALFQ | Balb/c ALFQ | C57BL/6 Alhydrogel | Balb/c Alhydrogel |
|------------------------------------|-------------------------|--------------|-------------|--------------------|-------------------|
| 1B-05                              | S-Trimer-Ferritin       | X            | X           |                    |                   |
| 1B-06-PL                           | S-Trimer-Ferritin       | X            | X           | X                  | X                 |
| <b>RBD-Ferritin constructs</b>     |                         |              |             |                    |                   |
| pCOV no.                           | Immunogen design        | C57BL/6 ALFQ | Balb/c ALFQ | C57BL/6 Alhydrogel | Balb/c Alhydrogel |
| 50                                 | RBD-Ferritin            |              | X           |                    |                   |
| 58                                 | RBD-Ferritin            | X            | X           | X                  | X                 |
| 59                                 | RBD-Ferritin            |              | X           |                    |                   |
| 127                                | RBD(57+58)-Ferritin     | X            | X           | X                  | X                 |
| 129                                | RBD(50+58)-Ferritin     | X            | X           | X                  | X                 |
| 130                                | RBD(50+59)-Ferritin     |              | X           |                    |                   |
| 131                                | RBD(53+58)-Ferritin     | X            | X           | X                  | X                 |
| <b>S1-Ferritin constructs</b>      |                         |              |             |                    |                   |
| pCOV no.                           | Immunogen design        | C57BL/6 ALFQ | Balb/c ALFQ | C57BL/6 Alhydrogel | Balb/c Alhydrogel |
| 111                                | S1-Ferritin             | X            | X           |                    |                   |
| <b>RBD-NTD-Ferritin constructs</b> |                         |              |             |                    |                   |
| pCOV no.                           | Immunogen design        | C57BL/6 ALFQ | Balb/c ALFQ | C57BL/6 Alhydrogel | Balb/c Alhydrogel |
| 122                                | RBD-NTD-Ferritin        | X            | X           |                    |                   |
| 125                                | RBD(58)-NTD-Ferritin    |              | X           |                    | X                 |
| 146                                | RBD(53+58)-NTD-Ferritin | X            | X           | X                  | X                 |
| 147                                | RBD(57+58)-NTD-Ferritin | X            |             |                    |                   |

**Table S4. Animal immunogenicity SARS-CoV-2 pseudovirus neutralization ID50 and ID80, Related to Figure 5.**  
Numbers shown are the ID50/ID80 geometric mean titers for a group, with study week 2, 5, and 8 shown in vertical order.

| <b>Spike-Ferritin constructs</b>                    |                                                                  |                                                |                                           |                                    |                                       |
|-----------------------------------------------------|------------------------------------------------------------------|------------------------------------------------|-------------------------------------------|------------------------------------|---------------------------------------|
|                                                     |                                                                  | C57BL/6<br>ALFQ                                | Balb/c<br>ALFQ                            | C57BL/6<br>Alhydrogel              | Balb/c<br>Alhydrogel                  |
| 1B-05                                               | S-Trimer-Ferritin (x 2 groups)                                   | 702/189<br>8,709/2,346<br>13,076/5,647         | 115/<80<br>3,934/716<br>5,546/1,447       |                                    |                                       |
| 1B-06-PL                                            | S-Trimer-Ferritin                                                | 14,976/5,397<br>41,237/16,818<br>47,323/16,524 | 1,152/355<br>16,816/6,662<br>25,062/6,540 | 297/118<br>1074/239<br>3901/153    | 404/<80<br>1484/390<br>5591/1334      |
| <b>RBD-Ferritin constructs</b>                      |                                                                  |                                                |                                           |                                    |                                       |
| pCOV no.                                            | Immunogen design                                                 | C57BL/6<br>ALFQ                                | Balb/c<br>ALFQ                            | C57BL/6<br>Alhydrogel              | Balb/c<br>Alhydrogel                  |
| 50                                                  | RBD-Ferritin                                                     |                                                | X                                         |                                    |                                       |
| 58                                                  | RBD-Ferritin                                                     | 577/238<br>11,224/2,793<br>31,562/10,09        | 353/123<br>13,466/3,802<br>25,340/7,692   | 293/211<br>1,734/688<br>5,097/1261 | 232/<80<br>4,836/1,086<br>9,439/2,569 |
| 59                                                  | RBD-Ferritin                                                     |                                                | X                                         |                                    |                                       |
| 127                                                 | RBD(57+58)-Ferritin                                              | X                                              | X                                         | X                                  | X                                     |
| 129                                                 | RBD(50+58)-Ferritin                                              | X                                              | X                                         | X                                  | X                                     |
| 130                                                 | RBD(50+59)-Ferritin                                              |                                                | X                                         |                                    |                                       |
| 131                                                 | RBD(53+58)-Ferritin                                              | 358/107<br>15,950/5,667<br>38,110/12,824       | 270/95<br>13,090/3,539<br>32,969/10,079   | 682/163<br>1,181/403<br>2,845/529  | 119/<40<br>182/103<br>240/99          |
| <b>S1-Ferritin constructs</b>                       |                                                                  |                                                |                                           |                                    |                                       |
| pCOV no.                                            | Immunogen design                                                 | C57BL/6<br>ALFQ                                | Balb/c<br>ALFQ                            | C57BL/6<br>Alhydrogel              | Balb/c<br>Alhydrogel                  |
| 111                                                 | S1-Ferritin                                                      | 1,770/350<br>14,893/3,636<br>19,157/5,564      | 450/172<br>18,112/3,846<br>17,108/3,886   |                                    |                                       |
| <b>RBD-NTD-Ferritin constructs</b>                  |                                                                  |                                                |                                           |                                    |                                       |
| pCOV no.                                            | Immunogen design                                                 | C57BL/6<br>ALFQ                                | Balb/c<br>ALFQ                            | C57BL/6<br>Alhydrogel              | Balb/c<br>Alhydrogel                  |
| 122                                                 | RBD-NTD-Ferritin                                                 | X                                              | X                                         |                                    |                                       |
| 125                                                 | RBD(58)-NTD-Ferritin                                             |                                                | X                                         |                                    | X                                     |
| 146                                                 | RBD(53+58)-NTD-Ferritin                                          | 230/91<br>16,678/4,356<br>20,107/6,126         | 240/89<br>31,252/7,190<br>24,854/6,744    | <80/<80<br>667/460<br>940/289      | 662/<80<br>2,087/537<br>2,417/701     |
| 147                                                 | RBD(57+58)-NTD-Ferritin                                          | X                                              |                                           |                                    |                                       |
| <b>Non-Ferritin constructs</b>                      |                                                                  |                                                |                                           |                                    |                                       |
| pCOV no.                                            | Immunogen                                                        | C57BL/6<br>ALFQ                                | Balb/c<br>ALFQ                            | C57BL/6<br>Alhydrogel              | Balb/c<br>Alhydrogel                  |
| 8                                                   | RBD                                                              | <80/<80<br><80/<80<br>1,825/450                | <80/<80<br><80/<80<br>1,518/364           | <80/<80<br><80/<80<br><80/<80      | <80/<80<br><80/<80<br><80/<80         |
| 47                                                  | S-2P                                                             | 493/166<br>47,201/16,041<br>33,853/18012       | <80/<80<br>14,612/4,130<br>20,954/5660    | <80/<80<br>1175/288<br>4,619/1,168 | <80/<80<br>3,992/1,213<br>10,064/3132 |
| <b>Ferritin Construct designs in the literature</b> |                                                                  |                                                |                                           |                                    |                                       |
|                                                     | Immunogen (Reference)                                            |                                                | BALB/c<br>Quil-A+MPLA                     |                                    |                                       |
|                                                     | SΔC-Fer (Powell et al., 2021)                                    | Pseudovirus neutralization:                    | Prime: 1,600<br>Prime + Boost: 34,000     |                                    |                                       |
|                                                     |                                                                  |                                                | BALB/c<br>SAS adjuvant                    |                                    |                                       |
|                                                     | RBD-Ferritin incorporating SpyTag-Spycatcher (Kang et al., 2020) | Live virus neutralization                      | FRNT <sub>90</sub> : 8,192                |                                    |                                       |
